1 **Title:** Spontaneous emergence of music detectors in a deep neural network

2

3 **Authors:** Gwangsu Kim<sup>1</sup>, Dong-Kyum Kim<sup>1</sup>, Hawoong Jeong<sup>1,2\*</sup>

4 <sup>1</sup>Department of Physics, Korea Advanced Institute of Science and Technology, Daejeon 34141, Korea

5 <sup>2</sup>Center for Complex Systems, Korea Advanced Institute of Science and Technology, Daejeon 34141, Korea

6 \*Corresponding author. Email: [hjeong@kaist.edu](mailto:hjeong@kaist.edu)

7

8 **One-sentence summary**

9 Music-selectivity can arise spontaneously in deep neural networks trained for natural sound

10 detection without learning music.

11

## 12 **Abstract**

13 Music exists in almost every society, has universal acoustic features, and is processed by  
14 distinct neural circuits in humans even with no experience of musical training. These  
15 characteristics suggest an innateness of the sense of music in our brain, but it is unclear  
16 how this innateness emerges and what functions it has. Here, using an artificial deep  
17 neural network that models the auditory information processing of the brain, we show that  
18 units tuned to music can spontaneously emerge by learning natural sound detection, even  
19 without learning music. By simulating the responses of network units to 35,487 natural  
20 sounds in 527 categories, we found that various subclasses of music are strongly clustered  
21 in the embedding space, and that this clustering arises from the music-selective response  
22 of the network units. The music-selective units encoded the temporal structure of music in  
23 multiple timescales, following the population-level response characteristics observed in  
24 the brain. We confirmed that the process of generalization is critical for the emergence of  
25 music-selectivity and that music-selectivity can work as a functional basis for the  
26 generalization of natural sound, thereby elucidating its origin. These findings suggest that  
27 our sense of music can be innate, universally shaped by evolutionary adaptation to process  
28 natural sound.

29

30

31 **MAIN**

32 Music is a cultural universal of all human beings, having common elements found worldwide<sup>1,2</sup>,  
33 but it is unclear how such universality arises. As the perception and production of music stem  
34 from the ability of our brain to process the information about musical elements<sup>3-7</sup>, the universality  
35 question is closely related to how neural circuits for processing music develop, and how  
36 universals arise during the developmental process regardless of the diversification of neural  
37 circuits derived by the spectacular variety of sensory inputs from different cultures and societies.

38 In our brain, music is processed by music-selective neural populations in distinct regions  
39 of the non-primary auditory cortex; these neurons respond selectively to music and not speech or  
40 other environmental sounds<sup>6,8,9</sup>. Several experimental observations suggest that music-selectivity  
41 and an ability to process the basic features of music develop spontaneously, without special need  
42 for an explicit musical training<sup>10</sup>. For example, a recent neuroimaging study showed that music-  
43 selective neural populations exist in not only individuals who had explicit musical training but  
44 also in individuals who had almost no explicit musical training<sup>11</sup>. In addition, it was reported that  
45 even infants have an ability to perceive multiple acoustic features of music<sup>12,13</sup>, such as melody  
46 that is invariant to shifts in pitch level and tempo, similar to adults. One intuitive explanation is  
47 that passive exposure to life-long music may initialize the music-selective neural populations<sup>11</sup>, as  
48 hearing occurs even during pre-natal periods<sup>14</sup>. However, the basic machinery of music  
49 processing, such as harmonicity-based sound segregation, has been observed not only in  
50 Westerners but also in native Amazonians who had limited exposure to concurrent pitches in  
51 music<sup>15</sup>. These findings raise speculations on whether exposure to music is necessary for the  
52 development of music-selectivity and how the universality of music can arise in different cultures.

53 Recent modeling studies using artificial deep neural networks (DNNs) have provided  
54 insights into the principles underlying the development of the sensory functions in the brain<sup>16-19</sup>.

55 In particular, it was suggested that a brain-like functional encoding of sensory inputs can arise as  
56 a by-product of optimization to process natural stimuli in DNNs. For example, responses of DNN  
57 models trained for classifying natural images were able to replicate visual cortical responses and  
58 could be exploited to control the response of real neurons beyond the naturally-occurring level<sup>20–</sup>  
59 <sup>22</sup>. Even high-level cognitive functions have been observed in networks trained to classify natural  
60 images, namely the Gestalt closure effect<sup>23</sup> and the ability to estimate the number of visual items  
61 in a visual scene<sup>24,25</sup>. Furthermore, a DNN trained for classifying music genres and words was  
62 shown to replicate human auditory cortical responses<sup>26</sup>, implying that such task-optimization  
63 provides a plausible means for modeling the functions of the auditory cortex. Based on this, we  
64 investigated a scenario in which music-selectivity can arise as a by-product of adaptation to  
65 natural sound processing in neural circuits<sup>27–30</sup>, so that the statistical patterns of natural sounds  
66 constrain universals of music in our brain.

67 We initially tested whether a distinct representation of music can arise in a DNN trained  
68 for detecting natural sounds (including music) using the AudioSet dataset<sup>31</sup>. Previous work  
69 suggested that a DNN trained to classify music genres and word categories can explain the  
70 responses of the music-selective neural populations in the brain<sup>26</sup>. Thus, it was expected that  
71 DNNs can learn general features of music to distinguish them from diverse natural sound  
72 categories.

73 The dataset we used consists of 10 s real-world audio excerpts from YouTube videos that  
74 have been human-labeled with 527 categories of natural sounds (**Fig. 1A**, 17,902 training data and  
75 17,585 test data with balanced numbers for each category to avoid overfitting for a specific class).  
76 The design of the network model (**Fig. 1B** and **Table S1**) is based on conventional convolutional  
77 neural networks<sup>32</sup>, which have been employed to successfully model both audio event detection<sup>33</sup>  
78 and information processing of the human auditory cortex<sup>26</sup>. The network was trained to detect all

79 audio categories in each 10 s excerpt (e.g., music, speech, dog barking, etc.). As a result, the  
80 network achieved reasonable performance in audio event detection as shown in **Fig. S1A**. After  
81 training, 17,585 test data was presented to the network and the responses of the units in the  
82 average pooling layer were used as feature vectors representing the data.

83 By analyzing the feature vectors of music and non-music data, we confirmed that the  
84 network trained with music has a unique representation for music, distinct from other sounds. We  
85 used t-distributed stochastic neighbor embedding (t-SNE) to visualize the 256-dimensional  
86 feature vectors in two dimensions, which ensures that data close in the original dimensions remain  
87 close in two dimensions<sup>34</sup>. The resulting t-SNE embedding shows that the distribution of music  
88 data is clustered in a distinct territory of the embedding space, clearly separated from non-music  
89 data (**Fig. S1B**). Such a result is expected; as music was included in the training data, the network  
90 can learn the features of music that distinguish music from other categories. Given this, one might  
91 expect that such a distinct representation of music would not appear if music were discarded from  
92 the training dataset.

93 However, further investigation showed that the distinct representation for music can still  
94 arise in a DNN trained without music. To test this, we discarded the data that contain any music-  
95 related categories from the training dataset and trained the network to detect other audio events  
96 except the music-related categories. As a result, the network was not able to detect music-related  
97 categories, but still achieved reasonable performance in other audio event detection (**Fig. 1C**).  
98 Interestingly though, the distribution of music was still clustered in a distinct regime of the t-SNE  
99 embedding space, despite the network not being trained with music (**Fig. 1D**). We quantified such  
100 separation by calculating the segregation index (SI) between music and non-music in the t-SNE  
101 space. The SI of the network trained with natural sound excluding music was comparable to that  
102 of the network trained with natural sound including music (**Fig. S1B**), implying that training with  
103 music is not necessary for the distinct representation of music by the DNN.

104 Such observation raises a question on how such distinct representations emerge without  
105 training music. Based on previous notions<sup>27–30</sup>, we speculated that features important for  
106 processing music can spontaneously emerge as a by-product of learning natural sound processing  
107 in DNNs. To rule out other possibilities first, we tested two alternative scenarios: 1) music and  
108 non-music can be separated in the representation space of the log-Mel spectrogram using linear  
109 features, so that a nonlinear feature extraction process is not required, and 2) units in the network  
110 selectively respond to the trained categories but not to unseen categories, so that the distinct  
111 representation emerges without any music-related features in the network.

112 We first confirmed that the distinct representation did not appear when conventional linear  
113 models were used. To test this, feature vectors were obtained from data in the log-Mel  
114 spectrogram space by applying two conventional models for linear feature extraction: principal  
115 component analysis (PCA, **Fig. 1E** and **Fig. S2A**) and a spectro-temporal two-dimensional-Gabor  
116 filter bank (GBFB) model of auditory cortical response<sup>35,36</sup> (**Fig. 1E** and **Fig. S2C**, Methods).  
117 Next, we applied the t-SNE embedding method to the obtained vectors, as in **Fig. 1D**, and  
118 analyzed the distribution. The resulting embedding generated by the PCA and GBFB methods did  
119 not show a clear separation between music and non-music (**Figs. S2B and S2D**), while showing  
120 significantly lower SI values compared to the SI of networks trained without music (PCA: SI =  
121 0.365,  $p = 0.031$ ; GBFB: SI = 0.331,  $p = 0.031$ , Wilcoxon signed rank-sum test).

122 To further confirm this tendency while avoiding any distortion of data distribution that  
123 might arise from the dimension reduction process, we fitted a linear regression model to classify  
124 music and non-music in the training dataset by using their feature vectors as predictors and tested  
125 the classification performance using the test dataset (**Fig. 1F**). As a result, the network trained  
126 with natural sounds yielded significantly higher accuracy (mAP of network trained without music:  
127  $0.883 \pm 0.005$ , chance level: 0.246) than PCA or GBFB (PCA: mAP = 0.515,  $p = 0.031$ ; GBFB:  
128 mAP = 0.529,  $p = 0.031$ , Wilcoxon signed rank-sum test). Moreover, the classification accuracy

129 was almost unchanged even when the linear features were used together with the features from  
130 the network (Net+PCA: mAP =  $0.881 \pm 0.006$ , Net+GBFB: mAP =  $0.875 \pm 0.016$ ). These results  
131 suggest that conventional linear features cannot explain the distinct representation of music found  
132 in the embedding space.

133 Next, we tested whether the distinct representation is due to the specificity of the unit  
134 response to the trained categories<sup>37,38</sup>. It is possible that all features learned by the network are  
135 specifically fitted to the trained sound categories, so that the sounds of the trained categories  
136 would elicit a reliable response from the units while the sounds of unseen categories (including  
137 music) would not. To test this, we checked whether the average response of the units to music is  
138 significantly smaller than the non-music stimuli. Interestingly, the average response to music was  
139 stronger than the average response to non-music (**Fig. 2A**,  $p < 10^{-10}$ , Wilcoxon signed rank-sum  
140 test). This suggests that features optimized to detect natural sound can also be rich repertoires of  
141 music; i.e., the network may have learned features of music throughout the training process even  
142 though music was completely absent in the training data.

143 Based on the above results, we investigated whether units in the network exhibit music-  
144 selective responses. We used two criteria to confirm this: 1) whether some units show a  
145 significantly stronger response to music than other sounds, and 2) whether those units encode the  
146 temporal structure of music in multiple timescales.

147 First, we confirmed that some units in the network respond selectively to music rather than  
148 other sounds. To evaluate this, we define and quantify the music-selectivity index (MSI) of each  
149 network unit as the difference between the average response to music and non-music in the  
150 training dataset normalized by their unpooled variance<sup>39</sup> (i.e., *t*-statistics, Methods). The units  
151 with the top 12.5% MSI values (MSI =  $51.0 \pm 9.6$ ) showed a 2.76 times stronger response to  
152 music than other sounds in the test dataset on average (**Fig. 2B**), and thus were considered as  
153 putative music-selective units. We confirmed that the response of these music-selective units can

154 be exploited for the music classification task (**Fig. 2C**, accuracy: AP:  $0.842 \pm 0.010$ ) using a  
155 linear classifier as in **Fig. 1F**. In contrast, using other units with intermediate MSI values showed  
156 significantly lower performance (top 37.5–50%, AP:  $0.359 \pm 0.044$ ,  $p = 0.031$ , Wilcoxon signed  
157 rank-sum test), confirming that the music-selective units provide useful information for  
158 processing music.

159       Second, we found that the music-selective units in the network showed sensitivity to the  
160 temporal structure of music, replicating previously observed characteristics of tuned neural  
161 populations in the human auditory cortex<sup>6,40,41</sup>. While music is known to have distinct features in  
162 both long and short timescales<sup>6,41</sup>, it is possible that the putative music-selective units only encode  
163 specific features of music in a specific (especially short) timescale. To test this, we adopted the  
164 ‘sound quilting’ method<sup>41</sup> (**Fig. 3A**, Methods), as follows: the original sound sources were  
165 divided into small segments (50–1,600 ms in octave range) and then reordered while considering  
166 smooth connections between segments. This shuffling method preserves the acoustic properties of  
167 the original sound on a short timescale but destroys it on a long timescale. It has been shown that  
168 music-selective neural populations in the human auditory cortex respond robustly when the  
169 segment size is large (e.g., 960 ms) so that most of the temporal structures are preserved, but the  
170 response is greatly reduced when the segment size is small (e.g., 30 ms) so that the temporal  
171 structure of the original sound is broken<sup>41</sup>. Similarly, after recording the response of the music-  
172 selective units to such sound quilts of music, we confirmed that their response is strongly  
173 correlated with the segment size (music quilt:  $r = 0.57$ ,  $p = 0.00093$ ). The response was mostly  
174 similar to the case of giving the original sound as an input in 800 ms segments, but greatly  
175 reduced when 50 ms segments were given (**Fig. 3B**, original:  $0.743 \pm 0.043$ ; 800 ms:  $0.751 \pm$   
176  $0.042$ ; 50 ms:  $0.569 \pm 0.028$ ;  $p_{\text{original-50 ms}} = 0.031$ ,  $p_{\text{original-800 ms}} = 0.91$ , Wilcoxon signed rank-sum  
177 test).



178 To test whether or not the effect is due to the quilting process itself, we provided quilts of  
179 music to the other non-music-selective units. In this condition, we confirmed that the average  
180 response remains constant even when the segment size changes (**Fig. 3C**). Furthermore, when  
181 quilted natural sound inputs were provided, the correlation between the response of the music-  
182 selective units and the segment length was weaker than when quilted music inputs were provided  
183 (**Fig. 3B**, non-music quilt:  $r = 0.45$ ,  $p = 0.011$ ), even though the significant correlation was  
184 observed for both types of inputs. Notably, all these characteristics of the network trained without  
185 music replicate those observed in the human brain<sup>6,41</sup>.

186 Then how does music-selectivity emerge in a network trained to detect natural sounds  
187 even without training music? In the following analysis, we found that music-selectivity can be a  
188 critical component to achieve generalization of natural sound in the network, and thus training to  
189 detect natural sound spontaneously generates music-selectivity.

190 Clues were found from the observation that the music-selectivity of the network gradually  
191 increases throughout the training process for natural sound detection. We measured both SI and  
192 task performance of networks over the course of training (**Fig. S3A**) and found that both SI and  
193 task performance monotonically increase and saturate at approximately 30 training epochs (**Fig.**  
194 **S3B**). Accordingly, we confirmed that SI and task performance are strongly correlated (**Fig. S3C**,  
195 from 0 to 50 epochs,  $r = 0.76$ ,  $p = 5.2 \times 10^{-49}$ ), implying that a network's natural sound detection  
196 performance can be used to predict its music-selectivity.

197 Based on this, we hypothesized that music-selectivity can act as a functional basis for the  
198 generalization of natural sound, so that the emergence of music-selectivity may directly stem  
199 from the ability to process natural sounds. To test this, we investigated whether music-selectivity  
200 emerges when the network cannot generalize natural sounds (**Fig. 4A**). To hinder the  
201 generalization, the labels of the training data were randomized to remove any systematic  
202 association between the sound sources and their labels, following a previous work<sup>42</sup>. Even in this

203 case, the network achieved high training accuracy (training AP > 0.95) by memorizing all the  
204 randomized labels in the training data, but showed a test accuracy at the chance level as expected.

205 We confirmed that the process of generalization is indeed critical for the emergence of  
206 music-selectivity in the network. For the network trained to memorize the randomized labels, the  
207 distributions of music and non-music were less distinct in the t-SNE embedding space compared  
208 to the network trained to generalize (**Fig. S4**, trained to memorize: SI =  $0.587 \pm 0.045$ ,  $p = 0.0090$ ,  
209 Wilcoxon rank-sum test), although some degree of separation was still observed. More  
210 importantly, units in the network trained to memorize did not encode the temporal structure of  
211 music. To test this, we analyzed the response of the units with the top 12.5% MSI values in the  
212 network trained to memorize using sound quilts of music as in **Fig. 3B**. We found that even if the  
213 segment size of the sound quilt changed, the response of the units remained mostly constant,  
214 unlike the music-selective units in the network trained to generalize natural sounds (**Fig. 4B**).  
215 This supports our hypothesis that music-selectivity is based on the process of generalization of  
216 natural sounds.

217 To further investigate the functional association, we performed an ablation test (**Fig. 4C**),  
218 in which the response of the music-selective units is silenced and then the sound event detection  
219 performance of the network is evaluated. If the music-selective units provide critical information  
220 for the generalization of natural sound, removing their inputs would greatly reduce the  
221 performance of the network. Indeed, we found that ablation of the music-selective units  
222 significantly deteriorates the performance of the network (**Fig. 4C**, red: top 12.5% music-selective  
223 units, performance drop = 19.7%,  $p_{\text{MSI top 12.5\%}-\text{Baseline}} = 0.031$ , Wilcoxon signed rank-sum test).  
224 This effect was much weaker when the same number of units with intermediate/bottom MSI  
225 values were silenced (intermediate:  $p = 0.031$ , bottom:  $p = 0.031$ ). Furthermore, the performance  
226 drop was even greater than that of ablating the units showing strong responses to inputs on  
227 average (top 12.5% L1 norm, performance drop = 8.0%,  $p_{\text{MSI top 12.5\%}-\text{L1norm top 12.5\%}} = 0.031$ ,

228 Wilcoxon signed rank-sum test). This suggests that music and other natural sounds share key  
229 features, and thus music-selective units can play a functionally important role not only in music  
230 processing but also in natural sound detection.

231

## 232 **Discussions**

233           What is the origin of music? Here, we put forward the notion that neural circuits for  
234 processing the basic elements of music can develop spontaneously as a by-product of adaptation  
235 for natural sound processing. In the DNN trained for natural sound detection in this work, music  
236 was distinctly represented even when music was not included in the training data. Such distinction  
237 cannot be explained by conventional linear features, but rather arises from the response of the  
238 music-selective units in the feature extraction layer. The music-selectivity was also sensitive to  
239 the temporal structure of music, replicating all of the observed characteristics of the music-  
240 selective neural populations in the brain. Further investigation suggested that music-selectivity  
241 can work as a functional basis for the generalization of natural sound, revealing how it can  
242 emerge without learning music. All together, these results support the notion that a universal  
243 template of music can arise from evolutionary pressure to process natural sound.

244           Our model provides a simple explanation about why a DNN trained to classify musical  
245 genres replicated the response characteristics of the human auditory cortex<sup>26</sup>, although it is  
246 unlikely that the human auditory system itself has been optimized to process music. This is  
247 because training with music would result in learning general features for natural sound processing,  
248 as music and natural sound processing share a common functional basis. The existence of a basic  
249 ability to perceive music in multiple non-human species is also explained by the model. Our  
250 analysis showed that music-selectivity lies on the continuum of learning natural sound processing.  
251 If the mechanism also works in the brain, such ability would appear in a variety of species  
252 adapted to natural sound processing, but to varying degrees. Consistent with this idea, the  
253 processing of basic elements of music has been observed in multiple non-human species: octave  
254 generalization in rhesus monkeys<sup>45</sup>, the relative pitch perception of two-tone sequences in  
255 ferrets<sup>46</sup>, and a pitch perception of marmoset monkeys similar to that of humans<sup>47</sup>.  
256 Neurophysiological observations that neurons in the primate auditory cortex selectively respond

257 to pitch<sup>48</sup> or harmonicity<sup>49</sup> were also reported, further supporting the notion. A further question is  
258 whether phylogenetic lineage would reflect the ability to process the basic elements of music, as  
259 our model predicts that music-selectivity is correlated with the ability to process natural sounds.

260 Our results also provide insights into the workings of audio processing in DNNs. Recent  
261 works showed that the class selectivity of DNN units is a poor predictor of the importance of the  
262 units and can even impair generalization performance<sup>51,52</sup>, possibly because it can induce  
263 overfitting to a specific class. On the other hand, we found that music-selective units are  
264 important for the natural sound detection task, and a good predictor of DNN performance. One  
265 possible explanation is that the music-selective units have universal features for the generalization  
266 of other natural sounds rather than specific features for specific classes, and thus removing them  
267 greatly hinders the performance of the DNN. Thus, these results also support the notion that the  
268 general features of natural sounds learned by DNNs are key features that make up music.

269 In summary, we demonstrated that music-selectivity can spontaneously arise in a DNN  
270 trained with real-world natural sounds without music, and that the music-selectivity provides a  
271 functional basis for the generalization of natural sound processing. By replicating the key  
272 characteristics of the music-selective neural populations in the brain, our results encourage the  
273 possibility that a similar mechanism could occur in the biological brain, as suggested for visual<sup>22-</sup>  
274 <sup>24</sup> and navigational<sup>53</sup> functions using task-optimized DNNs. Our findings support the notion that  
275 ecological adaptation may initiate various functional tunings in the brain, providing insight into  
276 how the universality of music and other innate cognitive functions arises.

277

## 278 **Materials and Methods**

279 All simulations were done in Python using the PyTorch and TorchAudio framework.

### 280 **Neural network model**

281 Our simulations were performed with conventional convolutional neural networks for audio  
282 processing. At the input layer, the original sound waveform (sampling rate = 22,050 Hz) was  
283 transformed into a log-Mel spectrogram (64 mel-filter banks in the frequency range of 0 Hz to  
284 8,000 Hz, window length: 25 ms, hop length: 12.5 ms). Next, four convolutional layers followed  
285 by a batch-normalization layer and a max-pooling layer (with ReLU activation and a dropout rate  
286 of 0.2) extracted the features of the input data. The global average pooling layer calculated the  
287 average activation of each feature map of the final convolutional layer. These feature values were  
288 passed to two successive fully connected layers, and then a sigmoid function was applied to  
289 generate the final output of the network. The detailed hyperparameters are given in **Table S1**.

### 290 **Stimulus dataset**

291 The dataset we used is the AudioSet dataset<sup>31</sup>, a collection of human-labeled (multi-label) 10 s  
292 clips taken from YouTube videos. We used a balanced dataset (17,902 training data and 17,585  
293 test data from distinct videos) consisting of 527 hierarchically organized audio event categories  
294 (e.g., ‘classical music’ under ‘music’). Music-related categories were defined as all classes under  
295 the music hierarchy. Each excerpt in the dataset is intrinsically multi-labeled as different sounds  
296 generally co-occur in a natural environment, but a sufficient number of data was selected to  
297 contain only music-related categories (3,620 in the training set and 4,033 in the test set) and no  
298 music-related categories (11,087 in the training set and 10,616 in the test set). To test for the  
299 distinct representation of music, the data were reclassified into music, non-music, and mixed  
300 sound, and then mixed sounds were excluded in the analysis of music-selectivity. This was

301 required because some data that contained music-related categories can also contain other audio  
302 categories (e.g., music + barking).

### 303 **Network training**

304 We trained the network to detect all sound categories in each 10 s clip (multi-label detection task).  
305 To that aim, the loss function of the network was chosen as the binary cross-entropy between the  
306 target ( $y$ ) and the output ( $x$ ), which is defined as

$$l = -[y \cdot \log x + (1 - y) \cdot \log(1 - x)]$$

307 for each category. For optimizing this loss function, we employed the AdamW optimizer with  
308 weight decay = 0.01<sup>54</sup>. Each network was trained for 100 epochs (200 epochs for the randomized  
309 labels) with a batch size of 32 and the One Cycle learning rate (LR) method<sup>55</sup>. The One Cycle LR  
310 is an LR scheduling method for faster training and preventing the network from overfitting during  
311 the training process. This method linearly anneals the LR from the initial LR  $4 \times 10^{-5}$  to the  
312 maximum LR 0.001 for 30 epochs and then from the maximum LR to the minimum LR  $4 \times 10^{-9}$   
313 for the remaining epochs. For every training condition, simulations were run for five different  
314 random seeds of the network. The network parameters used in the analysis were determined from  
315 the epoch that achieved the highest average precision over the training epochs with 10% of the  
316 training data used as a validation set.

### 317 **Analysis of the responses of the network units**

318 The responses of the network units in the average pooling layer were analyzed as feature vectors  
319 (256 dimensions) representing the data. After t-SNE embedding (perplexity = 30) of the feature  
320 vectors, we measured the SI to quantify the separation between the probability distribution of  
321 music and non-music, which is defined as

$$SI = 1 - (\text{Bhattacharya coefficient}) = 1 - \sum_{x,y} \sqrt{p_{music}(x,y) \times p_{non-music}(x,y)}$$

322 where  $p$  represents the probability distribution of music and non-music in t-SNE embedding  
 323 space.

324 Following a previous experimental study<sup>39</sup>, the music-selectivity index of each unit was  
 325 defined as

$$MSI = \frac{m_{music} - m_{non-music}}{\sqrt{\frac{s_{music}^2}{n_{music}} + \frac{s_{non-music}^2}{n_{non-music}}}}$$

326 where  $m$  is the average response of a unit to music and non-music stimulus,  $s$  is the standard  
 327 deviation, and  $n$  is the number of each type of data.

### 328 **Extraction of linear features using conventional approaches**

329 The linear features of the log-Mel spectrogram of the natural sound data were extracted by using  
 330 principal component analysis (PCA) and the spectro-temporal two-dimensional-Gabor filter bank  
 331 (GBFB) model following previous works<sup>35,36</sup>. In the PCA case, feature vectors were obtained  
 332 from the top 256 principal components (total explained variance: 0.965). In the case of the GBFB  
 333 model, a set of Gabor filters were designed to detect specific spectro-temporal modulation  
 334 patterns, which are defined as

$$g(k, n) = s_{w_k}(k - k_0) \cdot s_{w_n}(n - n_0) \cdot h_{\frac{v_k}{2w_k}}(k - k_0) \cdot h_{\frac{v_n}{2w_n}}(n - n_0)$$

$$h_b(x) = \begin{cases} 0.5 - 0.5 \cos\left(\frac{2\pi x}{b}\right) & -\frac{b}{2} < x < \frac{b}{2} \\ 0 & otherwise \end{cases}$$

$$s_w(x) = \exp(iwx)$$



335 where  $k$  and  $n$  represent the channel and time variables (center:  $k_0$  and  $n_0$ ),  $w_k$  is the spectral  
336 modulation frequency,  $w_n$  is the temporal modulation frequency, and  $v$  is the number of semi-  
337 cycles under the envelope. The distribution of the modulation frequencies was designed to limit  
338 the correlation between filters as follows,

$$w_x^{i+1} = w_x^i \frac{1 + \frac{c}{2}}{1 - \frac{c}{2}}, \quad c = d_x \frac{8}{v_x}$$

339 Here, we used  $d_k = 0.1$ ,  $d_n = 0.045$ ,  $v_k = v_n = 3.5$ , with  $w_{k, max} = w_{n, max} = \pi/4$ , resulting in 15  
340 spectral modulation frequencies, 18 temporal modulation frequencies, and 263 independent Gabor  
341 filters ( $15 \times 18 - 7$ ). Next, a log-Mel spectrogram was convolved with each Gabor filter and then  
342 averaged to generate the 263-dimensional feature vector representing the data. Nonetheless, our  
343 investigation showed that the specific choice of the parameters does not change the results  
344 significantly.

### 345 **Generation of sound quilts**

346 Sound quilts were created according to the algorithm proposed in a previous work<sup>41</sup>. First, the  
347 original sound sources were divided into small segments of equal size (50–1,600 ms in octave  
348 range). Next, these segments were reordered while minimizing the difference between the  
349 segment-to-segment change in log-Mel spectrogram of the original sound and that of the shuffled  
350 sound. Finally, we concatenated these segments while minimizing the boundary artifacts by  
351 matching the relative phase between segments at the junction<sup>41</sup>.

### 352 **Ablation test**

353 In the ablation test, the units in the network were grouped based on MSI value: top 12.5% units  
354 (MS units,  $N = 16$ ), middle 43.75–56.25% units, and bottom 12.5% units. In addition, we grouped

355 the units that showed a strong average response to the test data (top 12.5% L1 norm). The  
356 response of the units in each group was set to zero to investigate their contribution to natural  
357 sound processing.

### 358 **Statistical analysis**

359 All statistical variables, including the sample sizes, exact  $P$  values, and statistical methods, are  
360 indicated in the corresponding texts or figure legends.

### 361 **Data and code availability**

362 The data and codes that support the findings of this study are available at  
363 <https://github.com/kgspiano/Music>

364

365

366 **References**

- 367 1. Mehr, S. A. *et al.* Universality and diversity in human song. *Science*. **366**, eaax0868  
368 (2019).
- 369 2. Savage, P. E., Brown, S., Sakai, E. & Currie, T. E. Statistical universals reveal the  
370 structures and functions of human music. *Proc. Natl. Acad. Sci. U. S. A.* **112**, 8987–8992  
371 (2015).
- 372 3. Zatorrea, R. J. & Salimpoor, V. N. From perception to pleasure: Music and its neural  
373 substrates. *Proc. Natl. Acad. Sci. U. S. A.* **110**, 10430–10437 (2013).
- 374 4. Zatorre, R. J., Chen, J. L. & Penhune, V. B. When the brain plays music: Auditory-motor  
375 interactions in music perception and production. *Nat. Rev. Neurosci.* **8**, 547–558 (2007).
- 376 5. Koelsch, S. Toward a neural basis of music perception - a review and updated model.  
377 *Front. Psychol.* **2**, 1–20 (2011).
- 378 6. Norman-Haignere, S., Kanwisher, N. G. & McDermott, J. H. Distinct Cortical Pathways  
379 for Music and Speech Revealed by Hypothesis-Free Voxel Decomposition. *Neuron* **88**,  
380 1281–1296 (2015).
- 381 7. Tierney, A., Dick, F., Deutsch, D. & Sereno, M. Speech versus song: Multiple pitch-  
382 sensitive areas revealed by a naturally occurring musical illusion. *Cereb. Cortex* **23**, 249–  
383 254 (2013).
- 384 8. Leaver, A. M. & Rauschecker, J. P. Cortical representation of natural complex sounds:  
385 Effects of acoustic features and auditory object category. *J. Neurosci.* **30**, 7604–7612  
386 (2010).
- 387 9. Norman-Haignere, S. V. *et al.* Intracranial recordings from human auditory cortex reveal a  
388 neural population selective for musical song. *bioRxiv* 1–52 (2019) doi:10.1101/696161.
- 389 10. Mankel, K. & Bidelman, G. M. Inherent auditory skills rather than formal music training  
390 shape the neural encoding of speech. *Proc. Natl. Acad. Sci.* **115**, 13129–13134 (2018).

- 391 11. Boebinger, D., Norman-Haignere, S. V., McDermott, J. H. & Kanwisher, N. Music-  
392 selective neural populations arise without musical training. *J. Neurophysiol.* **125**, 2237–  
393 2263 (2021).
- 394 12. Trehub, S. E. The developmental origins of musicality. *Nat. Neurosci.* **6**, 669–673 (2003).
- 395 13. Trehub, S. E. Human Processing Predispositions and Musical Universals. in *The Origins of*  
396 *Music* (The MIT Press, 1999). doi:10.7551/mitpress/5190.003.0030.
- 397 14. DeCasper, A. & Fifer, W. Of human bonding: newborns prefer their mothers' voices.  
398 *Science (80-. )*. **208**, 1174–1176 (1980).
- 399 15. McPherson, M. J. *et al.* Perceptual fusion of musical notes by native Amazonians suggests  
400 universal representations of musical intervals. *Nat. Commun.* **11**, 1–14 (2020).
- 401 16. Richards, B. A. *et al.* A deep learning framework for neuroscience. *Nat. Neurosci.* **22**,  
402 1761–1770 (2019).
- 403 17. Hassabis, D., Kumaran, D., Summerfield, C. & Botvinick, M. Neuroscience-Inspired  
404 Artificial Intelligence. *Neuron* **95**, 245–258 (2017).
- 405 18. Kell, A. J. & McDermott, J. H. Deep neural network models of sensory systems: windows  
406 onto the role of task constraints. *Curr. Opin. Neurobiol.* **55**, 121–132 (2019).
- 407 19. Saxe, A., Nelli, S. & Summerfield, C. If deep learning is the answer, what is the question?  
408 *Nat. Rev. Neurosci.* **22**, 55–67 (2021).
- 409 20. Cadieu, C. F. *et al.* Deep neural networks rival the representation of primate IT cortex for  
410 core visual object recognition. *PLoS Comput. Biol.* **10**, e1003963 (2014).
- 411 21. Yamins, D. L. K. *et al.* Performance-optimized hierarchical models predict neural  
412 responses in higher visual cortex. *Proc. Natl. Acad. Sci.* **111**, 8619–8624 (2014).
- 413 22. Bashivan, P., Kar, K. & DiCarlo, J. Neural Population Control via Deep ANN Image  
414 Synthesis. *Science* **364**, eaav9436, (2019).

- 415 23. Kim, B., Reif, E., Wattenberg, M., Bengio, S. & Mozer, M. C. Neural Networks Trained on  
416 Natural Scenes Exhibit Gestalt Closure. *Comput. Brain Behav.* **4**, 251–263 (2021).
- 417 24. Nasr, K., Viswanathan, P. & Nieder, A. Number detectors spontaneously emerge in a deep  
418 neural network designed for visual object recognition. *Sci. Adv.* **5**, eaav7903 (2019).
- 419 25. Kim, G., Jang, J., Baek, S., Song, M. & Paik, S. B. Visual number sense in untrained deep  
420 neural networks. *Sci. Adv.* **7**, 1–10 (2021).
- 421 26. Kell, A. J. E., Yamins, D. L. K., Shook, E. N., Norman-Haignere, S. V. & McDermott, J.  
422 H. A Task-Optimized Neural Network Replicates Human Auditory Behavior, Predicts  
423 Brain Responses, and Reveals a Cortical Processing Hierarchy. *Neuron* **98**, 630–644.e16  
424 (2018).
- 425 27. Hauser, M. D. & McDermott, J. The evolution of the music faculty: A comparative  
426 perspective. *Nat. Neurosci.* **6**, 663–668 (2003).
- 427 28. Trainor, L. J. The origins of music in auditory scene analysis and the roles of evolution and  
428 culture in musical creation. *Philos. Trans. R. Soc. B Biol. Sci.* **370**, 20140089 (2015).
- 429 29. Honing, H., ten Cate, C., Peretz, I. & Trehub, S. E. Without it no music: Cognition, biology  
430 and evolution of musicality. *Philos. Trans. R. Soc. B Biol. Sci.* **370**, (2015).
- 431 30. Młynarski, W. & McDermott, J. H. Ecological origins of perceptual grouping principles in  
432 the auditory system. *Proc. Natl. Acad. Sci. U. S. A.* **116**, 25355–25364 (2019).
- 433 31. Gemmeke, J. F. *et al.* Audio Set: An ontology and human-labeled dataset for audio events.  
434 *ICASSP, IEEE Int. Conf. Acoust. Speech Signal Process. - Proc.* 776–780 (2017)  
435 doi:10.1109/ICASSP.2017.7952261.
- 436 32. Krizhevsky, A., Sutskever, I. & Hinton, G. E. ImageNet classification with deep  
437 convolutional neural networks. *Commun. ACM* **60**, 84–90 (2017).
- 438 33. Kong, Q. *et al.* PANNs: Large-Scale Pretrained Audio Neural Networks for Audio Pattern  
439 Recognition. *IEEE/ACM Trans. Audio Speech Lang. Process.* **28**, 2880–2894 (2020).

- 440 34. van der Maaten, L. J. P. & Hinton, G. E. Visualizing data using t-SNE. *J. Mach. Learn.*  
441 *Res.* **9**, 2579–2605 (2008).
- 442 35. Schädler, M. R., Meyer, B. T. & Kollmeier, B. Spectro-temporal modulation subspace-  
443 spanning filter bank features for robust automatic speech recognition. *J. Acoust. Soc. Am.*  
444 **131**, 4134–4151 (2012).
- 445 36. Schädler, M. R. & Kollmeier, B. Separable spectro-temporal Gabor filter bank features:  
446 Reducing the complexity of robust features for automatic speech recognition. *J. Acoust.*  
447 *Soc. Am.* **137**, 2047–2059 (2015).
- 448 37. Bau, D. *et al.* Understanding the role of individual units in a deep neural network. *Proc.*  
449 *Natl. Acad. Sci.* **117**, 30071–30078 (2020).
- 450 38. Zhou, B., Sun, Y., Bau, D. & Torralba, A. Revisiting the Importance of Individual Units in  
451 CNNs via Ablation. (2018).
- 452 39. Moore, J. M. & Woolley, S. M. N. Emergent tuning for learned vocalizations in auditory  
453 cortex. *Nat. Neurosci.* **22**, 1469–1476 (2019).
- 454 40. Abrams, D. A. *et al.* Decoding temporal structure in music and speech relies on shared  
455 brain resources but elicits different fine-scale spatial patterns. *Cereb. Cortex* **21**, 1507–  
456 1518 (2011).
- 457 41. Overath, T., McDermott, J. H., Zarate, J. M. & Poeppel, D. The cortical analysis of speech-  
458 specific temporal structure revealed by responses to sound quilts. *Nat. Neurosci.* **18**, 903–  
459 911 (2015).
- 460 42. Zhang, C., Bengio, S., Hardt, M., Recht, B. & Vinyals, O. Understanding deep learning  
461 requires rethinking generalization. (2016).
- 462 43. Conard, N. J., Malina, M. & Münzel, S. C. New flutes document the earliest musical  
463 tradition in southwestern Germany. *Nature* **460**, 737–740 (2009).
- 464 44. Lewicki, M. S. Efficient coding of natural sounds. *Nat. Neurosci.* **5**, 356–363 (2002).

- 465 45. Wright, A. A., Rivera, J. J., Hulse, S. H., Shyan, M. & Neiworth, J. J. Music perception  
466 and octave generalization in rhesus monkeys. *J. Exp. Psychol. Gen.* **129**, 291–307 (2000).
- 467 46. Yin, P., Fritz, J. B. & Shamma, S. A. Do ferrets perceive relative pitch? *J. Acoust. Soc. Am.*  
468 **127**, 1673–1680 (2010).
- 469 47. Song, X., Osmanski, M. S., Guo, Y. & Wang, X. Complex pitch perception mechanisms  
470 are shared by humans and a New World monkey. *Proc. Natl. Acad. Sci.* **113**, 781–786  
471 (2016).
- 472 48. Bendor, D. & Wang, X. The neuronal representation of pitch in primate auditory cortex.  
473 *Nature* **436**, 1161–1165 (2005).
- 474 49. Feng, L. & Wang, X. Harmonic template neurons in primate auditory cortex underlying  
475 complex sound processing. *Proc. Natl. Acad. Sci. U. S. A.* **114**, E840–E848 (2017).
- 476 50. McDermott, J. H., Schultz, A. F., Undurraga, E. A. & Godoy, R. A. Indifference to  
477 dissonance in native Amazonians reveals cultural variation in music perception. *Nature*  
478 **535**, 547–550 (2016).
- 479 51. Leavitt, M. L. & Morcos, A. Selectivity considered harmful: evaluating the causal impact  
480 of class selectivity in DNNs. (2020).
- 481 52. Morcos, A. S., Barrett, D. G. T., Rabinowitz, N. C. & Botvinick, M. On the importance of  
482 single directions for generalization. (2018).
- 483 53. Banino, A. *et al.* Vector-based navigation using grid-like representations in artificial  
484 agents. *Nature* **557**, 429–433 (2018).
- 485 54. Loshchilov, I. & Hutter, F. Decoupled Weight Decay Regularization. (2017).
- 486 55. Smith, L. N. & Topin, N. Super-Convergence: Very Fast Training of Neural Networks  
487 Using Large Learning Rates. (2017).
- 488
- 489

490 **Figures and Tables**

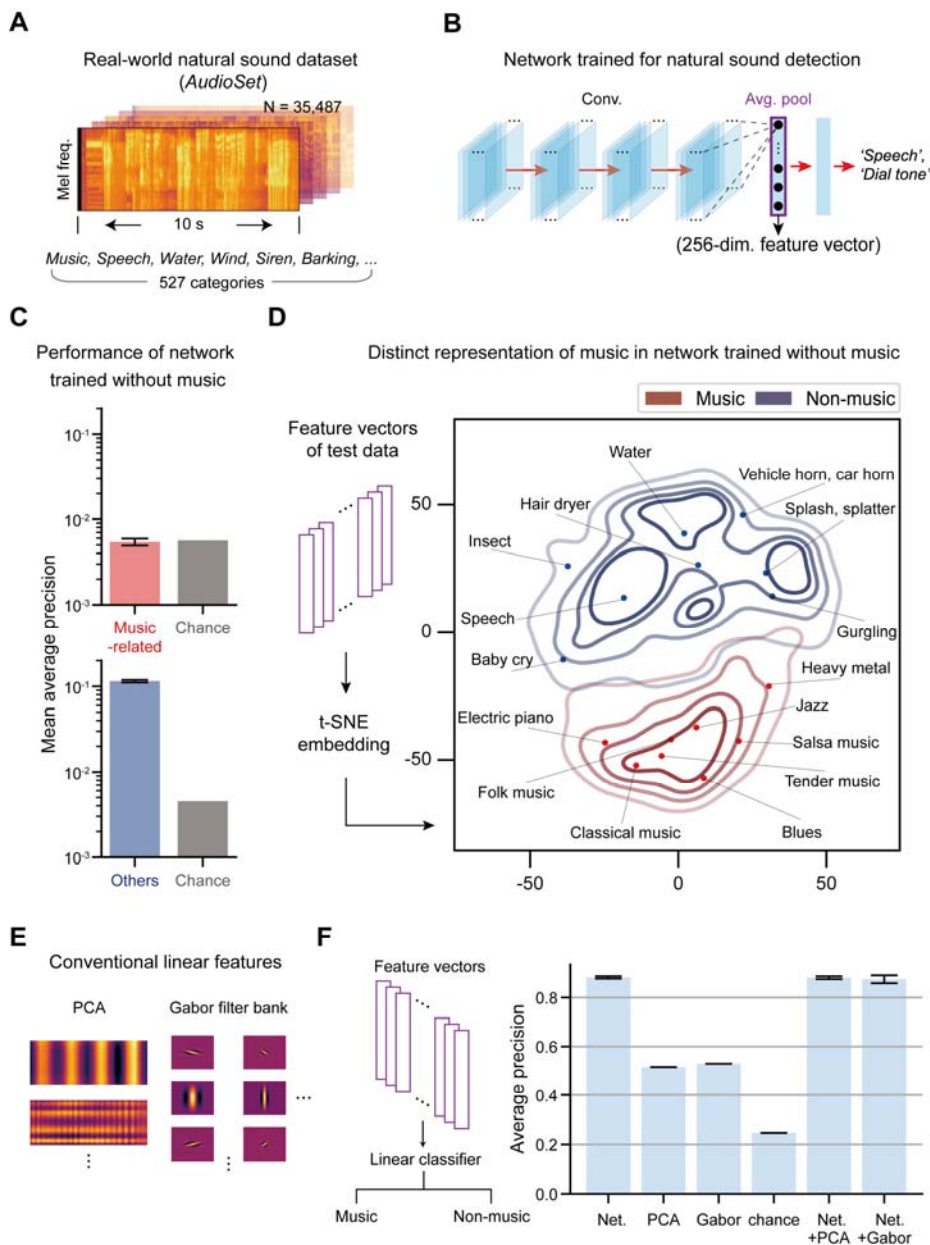

491

492 **Fig. 1. Distinct representation of music in deep neural networks trained for natural sound detection**  
 493 **with and without music.**

494 (A) Example log-Mel spectrograms of the natural sound data in AudioSet<sup>31</sup>. (B) Architecture of the deep  
 495 neural network used to detect the natural sound categories in the input data. The purple box indicates the  
 496 average pooling layer. (C) Performance (mean average precision, mAP) of the network trained without  
 497 music for music-related categories (top, red bars) and other categories (bottom, blue). (D) Density plot of  
 498 the t-SNE embedding of feature vectors obtained from the network in C. The lines represent iso-proportion  
 499 lines at 80%, 60%, 40%, and 20% levels. (E) Two conventional methods for linear feature extraction.



500 Examples of principal components (left) and Gabor filters (right) are shown. (F) Binary classification of  
501 the data using a linear regression classifier. Error bars represent the standard deviation for different  
502 network initialization conditions in (C) and (F).

503

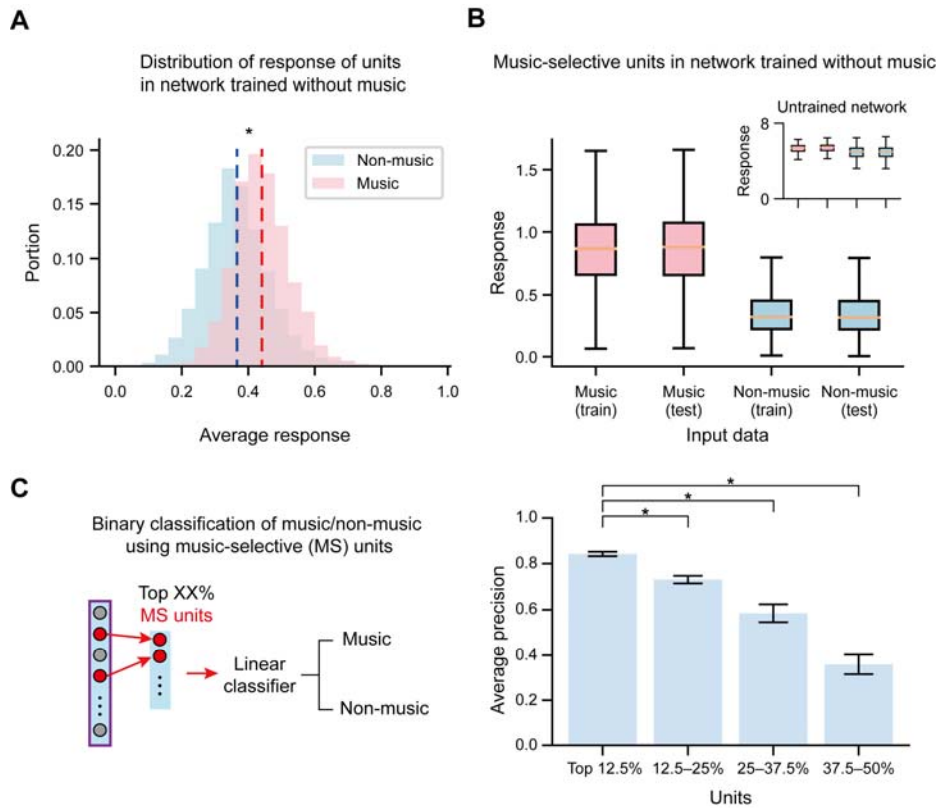

504

505 **Fig. 2. Selective response of units in the network to music.**

506 (A) Histograms of the response of the units averaged over music (red) and non-music (blue) stimuli in  
 507 networks trained without music. The dashed lines represent the response averaged over all units. (B)  
 508 Response of the music-selective units to music (red) and non-music stimuli. Inset: Response of the units in  
 509 the untrained network with the top 12.5% MSI values to music and non-music stimuli. Error bars represent  
 510 the standard deviation for various inputs. (C) Illustration of the binary classification of music and non-  
 511 music using the response of the music-selective units (left), and the performance of the linear classifier  
 512 (right). The asterisks indicate statistical significance ( $p < 0.05$ ) (from the top,  $p = 0.031$ ,  $p = 0.031$ ,  $p =$   
 513  $0.031$ , Wilcoxon signed rank-sum test). Error bars represent the standard deviation for different network  
 514 initialization conditions.

515

516

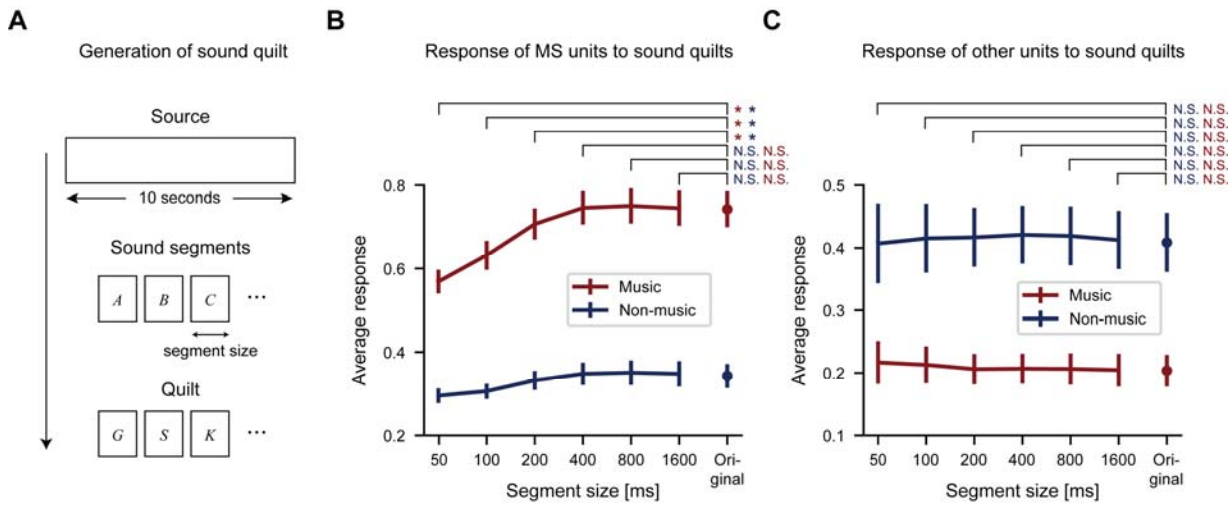

517

518 **Fig. 3. Encoding of the temporal structure of music by music-selective units in the**  
 519 **human brain.**

520 (A) Schematic diagram of the generation of sound quilts. (B) Response of the music-selective units to  
 521 sound quilts made of music (red) and non-music (blue). For the music quilts, from the top:  $p = 0.031$ ,  $p =$   
 522  $0.031$ ,  $p = 0.031$ ,  $p = 0.69$ ,  $p = 1.0$ ,  $p = 0.91$ ; for the non-music quilts, from the top:  $p = 0.031$ ,  $p = 0.031$ ,  $p =$   
 523  $0.031$ ,  $p = 0.97$ ,  $p = 1.0$ ,  $p = 1.0$ , Wilcoxon signed rank-sum test. (C) Response of the other units to  
 524 sound quilts made of music (red) and non-music (blue). For the music quilts, from the top:  $p = 0.91$ ,  $p =$   
 525  $0.94$ ,  $p = 0.84$ ,  $p = 0.91$ ,  $p = 0.91$ ,  $p = 0.68$ ; for the non-music quilts, from the top:  $p = 0.5$ ,  $p = 0.84$ ,  $p =$   
 526  $1.0$ ,  $p = 1.0$ ,  $p = 1.0$ ,  $p = 0.91$ . The asterisks indicate statistical significance ( $p < 0.05$ ). N.S.: non-  
 527 significant ( $p > 0.05$ ).

528

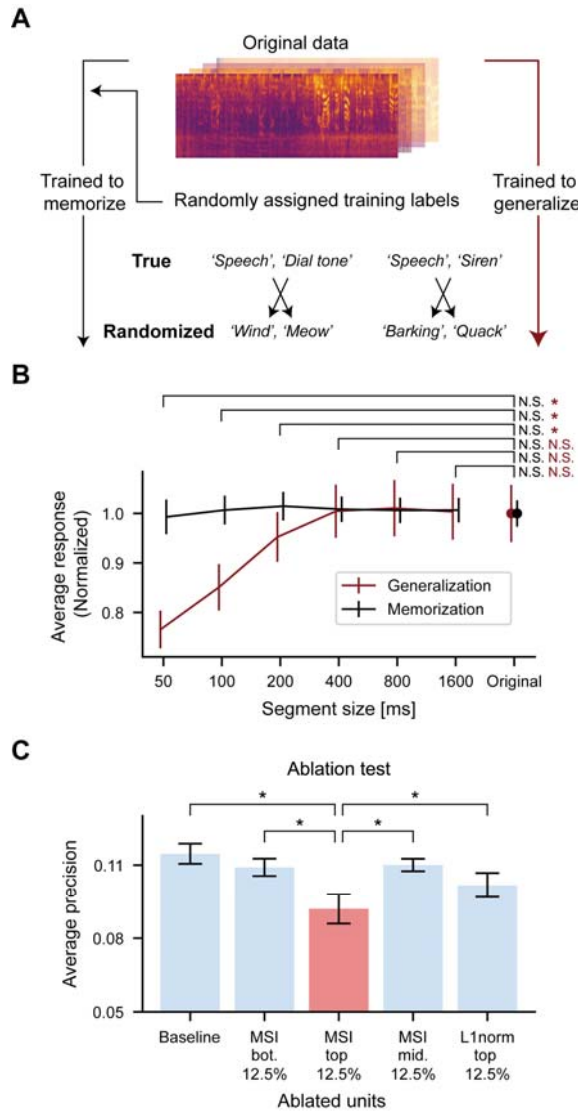

529

530 **Fig. 4. Music-selectivity as a generalization of natural sounds**

531 (A) Illustration of network training to memorize the data by randomizing the labels. (B) Response of the  
 532 units with the top 12.5% MSI values to music quilts in the networks trained with randomized labels (black,  
 533 memorization) compared to that of the network in Fig. 3B (red, generalization). To normalize the two  
 534 conditions, each response was divided by the average response to the original sound from each network.  
 535 For memorization, from the top:  $p = 0.41$ ,  $p = 0.69$ ,  $p = 0.97$ ,  $p = 1.0$ ,  $p = 1.0$ ,  $p = 0.94$ , Wilcoxon signed  
 536 rank-sum test. N.S.: non-significant ( $p > 0.05$ ). Error bars represent the standard deviation for different  
 537 network initialization conditions. (C) Performance of the network after the ablation of specific units (red:  
 538 ablation of music-selective units). From the top, from the left,  $p = 0.031$ ,  $p = 0.031$ ,  $p = 0.031$ ,  $p = 0.031$ ,  
 539 Wilcoxon signed rank-sum test. The asterisks indicate statistical significance ( $p < 0.05$ ).

540

541

542 **Supplementary Materials**

543 Fig. S1. Distinct representation of music in deep neural networks trained for natural sound

544 detection with music.

545 Fig. S2. T-SNE embedding of the feature vectors obtained by linear methods.

546 Fig. S3. Correlation of music-selectivity and network performance.

547 Fig. S4. T-SNE embedding of the feature vectors of the network trained to memorize

548 natural sounds with randomized labels.

549 Table S1. Summary of the network architecture.

550

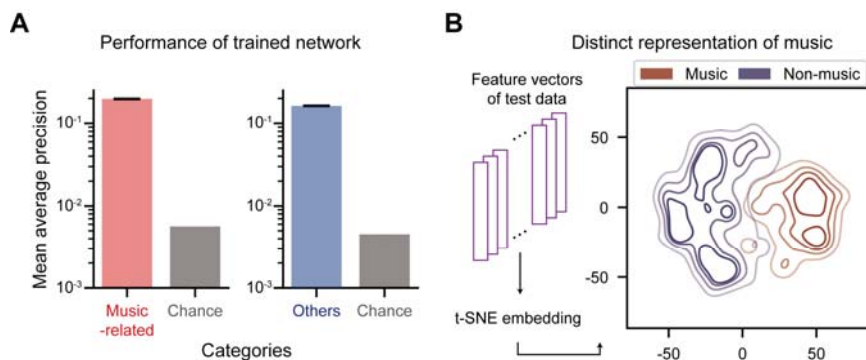

551

552 **Fig. S1. Distinct representation of music in deep neural networks trained for natural sound detection**

553 **with music.**

554 (A) Performance of the trained network for music-related categories (left, red bars) and other categories

555 (right, blue). (B) Density plot of the t-SNE embedding of feature vectors obtained from the trained

556 network. The lines represent iso-proportion lines at 80%, 60%, 40%, and 20% levels.

557

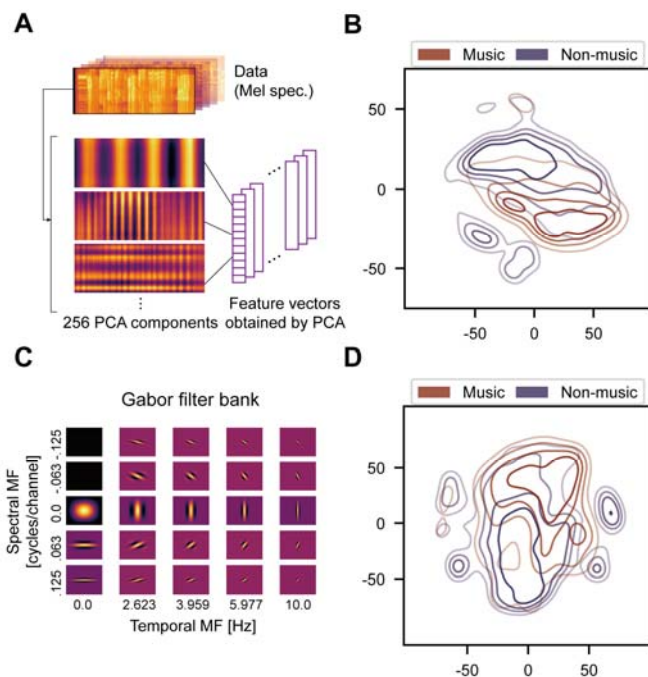

558

559 **Fig. S2. T-SNE embedding of the feature vectors obtained by linear methods.**

560 (A) Example PCA components obtained from the data. (B) Density plot of the t-SNE embedding of feature

561 vectors obtained from PCA. The lines represent iso-proportion lines at 80%, 60%, 40%, 20% levels. (C)

562 Example spectro-temporal Gabor filters. MF: modulation frequency. (D) Density plot of the t-SNE

563 embedding of feature vectors obtained from Gabor filters.

564

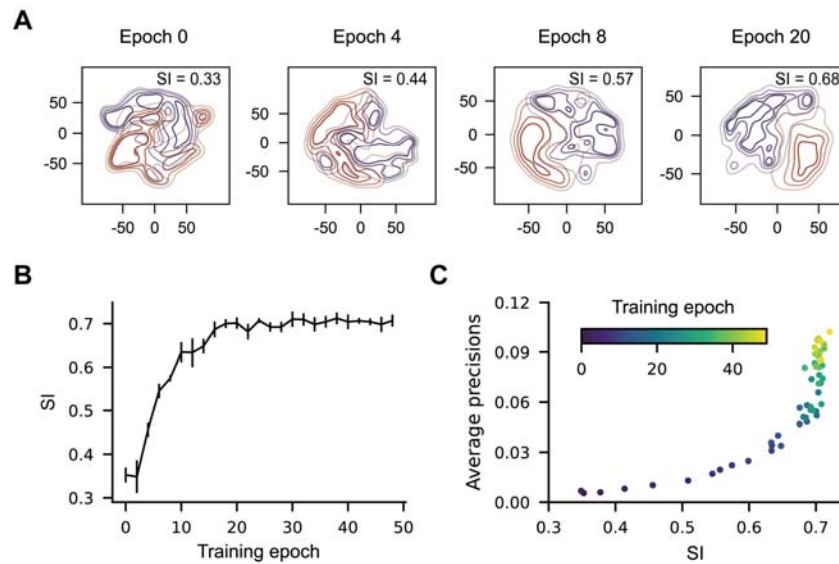

565

566 **Fig. S3. Correlation of music-selectivity and network performance.**

567 (A) Density plots of the t-SNE embeddings of music (red) and non-music (blue) over the training epochs.

568 (B) SI vs. training epoch, and (C) average precision vs. SI, showing that the segregation index and task

569 performance are strongly correlated. Error bars represent the standard deviation for different network

570 initialization conditions.

571



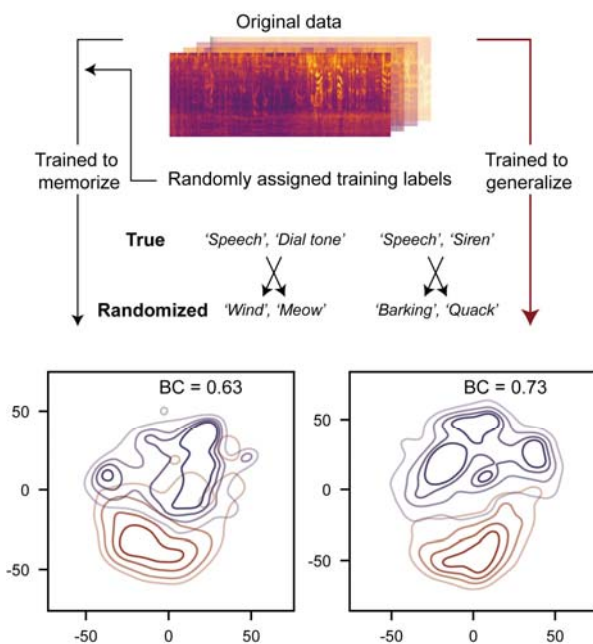

572

573 **Fig. S4. T-SNE embedding of the feature vectors of the network trained to memorize natural sounds**  
574 **with randomized labels.**

575 (top) Illustration of network training to memorize the data by randomizing the labels. (left) Density plot of  
576 the t-SNE embedding of the feature vectors obtained from the network trained with randomized labels and  
577 (right) with the original labels.

578

| Layer        | Type                      | Output Shape                               | Kernels                               | Activations                            |
|--------------|---------------------------|--------------------------------------------|---------------------------------------|----------------------------------------|
| Input        | Log-Mel spectrogram input | 64 × 802 × 1<br>(height × width × channel) |                                       |                                        |
| Conv1        | Convolution               | 30 × 200 × 32                              | Size: 5 × 5 × 1 × 32<br>Stride: 2 × 4 | Batch normalization and ReLU           |
| Pool1        | Max pooling               | 15 × 100 × 32                              | Size = 2 × 2<br>Stride = 2            | Dropout (p = 0.2)                      |
| Conv2        | Convolution               | 11 × 96 × 64                               | Size: 5 × 5 × 32 × 64<br>Stride: 1    | Batch normalization and ReLU           |
| Pool2        | Max pooling               | 10 × 95 × 64                               | Size = 2 × 2<br>Stride = 1            |                                        |
| Conv3        | Convolution               | 6 × 91 × 128                               | Size: 5 × 5 × 64 × 128<br>Stride = 1  | Batch normalization and ReLU           |
| Pool3        | Max pooling               | 5 × 90 × 128                               | Size: 2 × 2<br>Stride: 1              | Dropout                                |
| Conv4        | Convolution               | 1 × 86 × 256                               | Size: 5 × 5 × 192 × 256<br>Stride: 1  | Batch normalization, ReLU, and dropout |
| AvgPool1     | Global average pooling    | 1 × 1 × 256                                |                                       |                                        |
| FC1          | Fully Connected           | 256                                        | Weights: 256 × 256<br>Bias: 256 × 1   | ReLU and dropout                       |
| FC2 (Output) | Classification Output     | 527                                        | Weights: 527 × 256<br>Bias: 527 × 1   | Sigmoid                                |

579

580 **Table S1. Summary of the network architecture.**

581 The network consists of four convolutional layers for feature extraction (Conv1 – Conv4) and two fully  
582 connected layers for natural sound detection (FC1 – FC2). We note that the specific choice of  
583 hyperparameters does not significantly change the results in the main text.
